# Supplementary material
Source: PubMed Central journal article supplement (PMC5649009)
Supplement: IAI.00280-17_zii999092188s1.pdf [file IAI.00280-17_zii999092188s1.pdf]

1  
2 Fig. S1. Bacterial growth, bacterial binding to H292 monolayers, and PMN transepithelial  
3 migration are unaffected by pan-PLA<sub>2</sub> or cPLA<sub>2</sub>α inhibitors. (A) *S. pneumoniae* TIGR4 was  
4 grown as described in *Materials and Methods*, in the presence or absence of pan-PLA<sub>2</sub> inhibitors  
5 ACA and ONO-RS-082 or of the cPLA<sub>2</sub>α inhibitor. Growth was measured using a  
6 spectrophotometer. Shown is a representative of two experiments. (B) H292 monolayers were  
7 treated with pan-PLA<sub>2</sub> inhibitors ACA (100μM) or ONO-RS-082 (20μM); or the cPLA<sub>2</sub>α  
8 inhibitor (6μM) (please see *Materials and Methods*). Monolayers were washed and infected with  
9 *S. pneumoniae* TIGR4. The number of bacteria bound to monolayers was determined by viable  
10 counts. Shown is a representative of two experiments. (C) H292 monolayers were treated with  
11 pan-PLA<sub>2</sub> inhibitors ACA (100μM) or ONO-RS-082 (20μM); or the DAG lipase inhibitor RHC-  
12 80267 (labeled as RHC, 100μM); or the cPLA<sub>2</sub>α inhibitor (6μM) (please see *Materials and*  
13 *Methods*). The monolayers were washed and PMN transepithelial migration in response to fMLP  
14 was quantified by myeloperoxidase (MPO) assay. Monolayers treated with DMSO and HBSS  
15 +Ca/Mg were used as the vehicle control and negative control, respectively. Shown is a  
16 representative of two experiments.

17 Figure S2. cPLA<sub>2</sub>α promotes pulmonary inflammation in *S. pneumoniae*-infected mice. Mice  
18 (*cPLA<sub>2</sub>α*<sup>-/-</sup> or their WT littermates) were mock-infected with PBS or infected intratracheally with  
19 *S. pneumoniae* TIGR4, as detailed in *Materials and Methods*. Mice were sacrificed and  
20 bronchoalveolar lavage fluid (BALF) and lungs were collected. (A) Myeloperoxidase (MPO) in  
21 the homogenized lung samples and BALF was determined biochemically. Figures are  
22 representative of two independent experiments. \*\**p* < 0.005, \*\*\**p* < 0.001, using one-way

23 ANOVA. (B) Serial dilutions of the lung homogenate and the BALF were plated on blood agar  
 24 plates and bacterial CFUs were counted, ns= not significant.

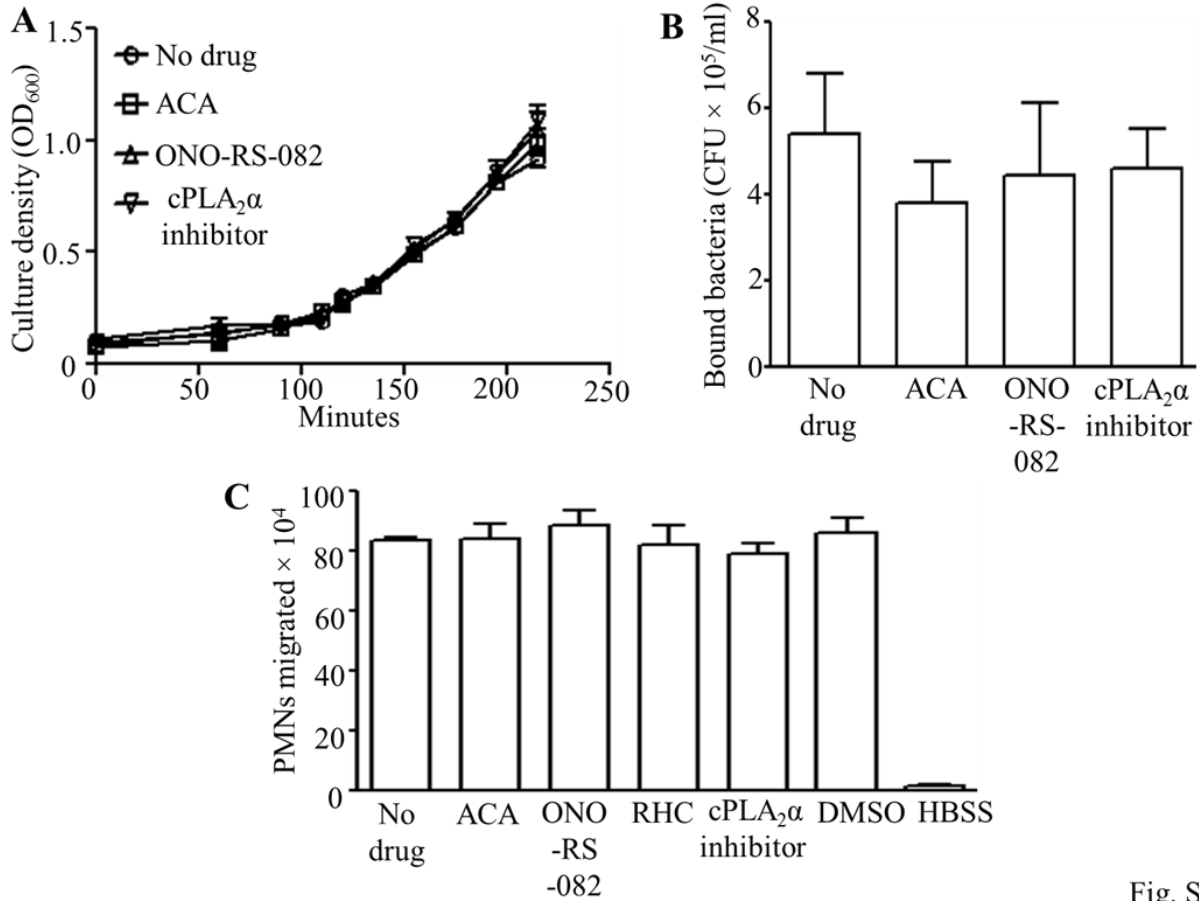

Fig. S1

25

26

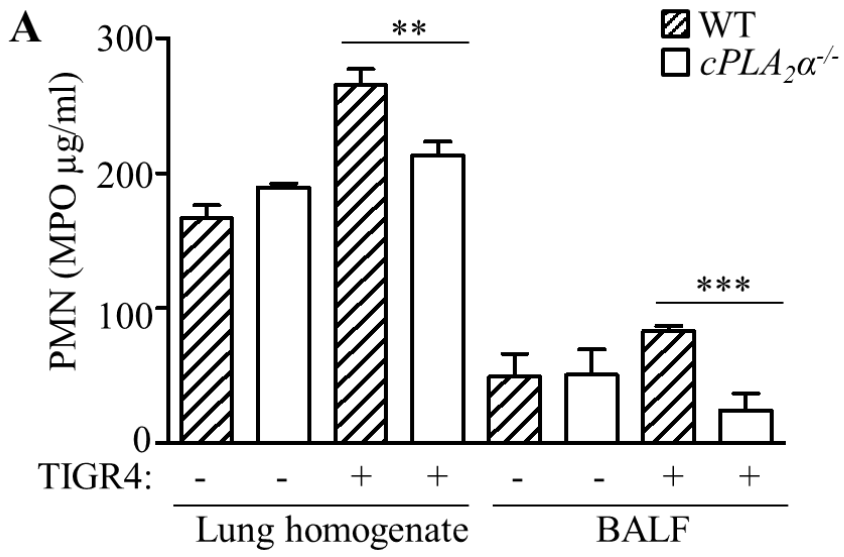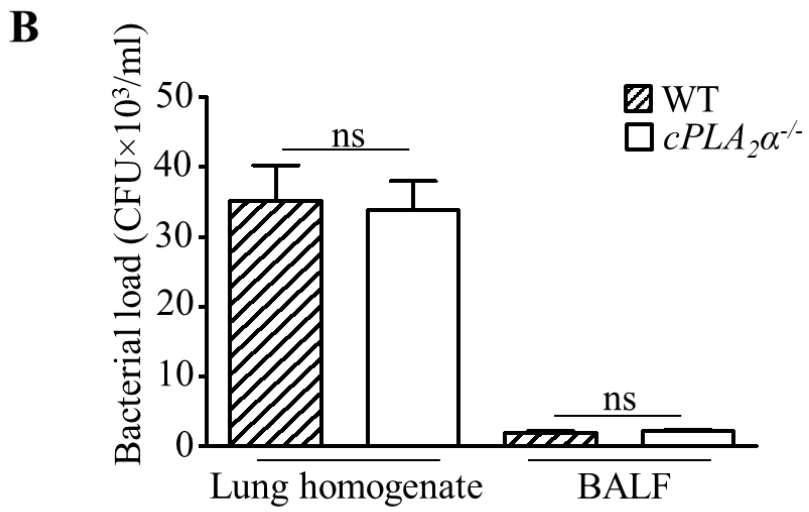

Fig. S2

27  
28  
29

30 Table S1

|                                  | Cytotoxicity |
|----------------------------------|--------------|
| HBSS, 2.5h                       | 1.4 (0.4)    |
| <i>S. pneumoniae</i> TIGR4, 2.5h | 1.84 (0.4)   |
| <i>S. pneumoniae</i> TIGR4, 5h   | 2.82 (0.8)   |
| 2% Triton X-100, 2.5h            | 68 (13.7)    |

31

32 Cytotoxicity in H292 monolayers in response to *S. pneumoniae* TIGR4 infection was assessed  
33 using the lactate dehydrogenase (LDH) assay [1]. Infection or treatment time is denoted in the  
34 table. Cytotoxicity was calculated as the amount of LDH in the supernatant as a percentage of  
35 total LDH (LDH inside the cell as well as released into the supernatant). Monolayers treated with  
36 Triton X-100 and HBSS (+Ca/Mg) were used as positive and negative controls, respectively.  
37 Shown is a representative of three experiments. Standard deviations are reported in parentheses.

38 Table S2

|                                  | HRP (ng/ml)  |
|----------------------------------|--------------|
| HBSS, 3.5h                       | 7.4 (0.3)    |
| <i>S. pneumoniae</i> TIGR4, 1.5h | 11.67 (3)    |
| <i>S. pneumoniae</i> TIGR4, 2.5h | 8.216 (0.77) |
| <i>S. pneumoniae</i> TIGR4, 3.5h | 12.73 (0.7)  |
| Trypsin-EDTA, 2.5h               | 57.42 (2)    |

39

40 Effect of *S. pneumoniae* infection on the barrier integrity of H292 monolayers was assessed by  
41 horseradish peroxidase (HRP) assay [1]. Barrier integrity was measured as the amount of HRP  
42 (ng/ml) that could breach the H292 monolayer following infection. Monolayers treated with  
43 trypsin-EDTA and HBSS (+Ca/Mg) were used as positive and negative controls, respectively.  
44 Shown is a representative of two experiments. Standard deviations are reported in parentheses.

45 Table S3

|                                                    | Cytotoxicity |
|----------------------------------------------------|--------------|
| HBSS                                               | 1.5 (0.4)    |
| ACA (100 $\mu$ M)                                  | 2.7 (0.9)    |
| ONO-RS-082 (20 $\mu$ M)                            | 2.1 (0.8)    |
| RHC-80267 (100 $\mu$ M)                            | 1.74 (0.9)   |
| cPLA <sub>2</sub> - $\alpha$ inhibitor (6 $\mu$ M) | 2.7 (1.3)    |
| 2% Triton X-100                                    | 66.37 (13.5) |

46

47 Cytotoxicity of H292 monolayers in response to pharmacological inhibitors used in this study  
48 was assessed using LDH assay [1]. Inhibitor doses are denoted in the table. Cytotoxicity is  
49 calculated as the amount of LDH in the supernatant as a percentage of total LDH (LDH inside  
50 the cell as well as released into the supernatant). Monolayers treated with Triton X-100 and  
51 HBSS (+Ca/Mg) were used as positive and negative controls, respectively. Shown is a  
52 representative of two experiments. Standard deviations are reported in parentheses.

53

54 Table S4

|                                      | HRP (ng/ml) |
|--------------------------------------|-------------|
| HBSS                                 | 10.6 (2.5)  |
| ACA (100μM)                          | 13.07 (3.8) |
| ONO-RS-082(20μM)                     | 10.48 (3.4) |
| RHC-80267 (100μM)                    | 17.74 (6.2) |
| cPLA <sub>2</sub> -α inhibitor (6μM) | 12.43 (4.5) |
| Trypsin-EDTA                         | 59.8 (9.8)  |

55

56 Effect of the pharmacological inhibitors on the barrier integrity of H292 monolayers was  
 57 assessed by horseradish peroxidase (HRP) assay [1]. Inhibitor doses are denoted in the table.  
 58 Barrier integrity was measured as the amount of HRP (ng/ml) that could breach the H292  
 59 monolayer in following the inhibitor treatment. Monolayers treated with trypsin-EDTA and  
 60 HBSS (+Ca/Mg) were used as positive and negative controls, respectively. Shown is a  
 61 representative of two experiments. Standard deviations are reported in parentheses.

62 1. Hurley, B.P., Siccardi, D., Mrsny, R.J., McCormick, B.A. , *Polymorphonuclear cell transmigration*  
 63 *induced by Pseudomonas aeruginosa requires the eicosanoid hepoxilin A3*. J Immunol, 2004. **173**(9): p.  
 64 5712-20.
